# Supplementary material for: Mesodermal gene expression during the embryonic and larval development of the articulate brachiopod Terebratalia transversa
Source: PubMed Central journal article supplement (PMC4404124; doi:10.1186/s13227-015-0004-8), 2015-04-11

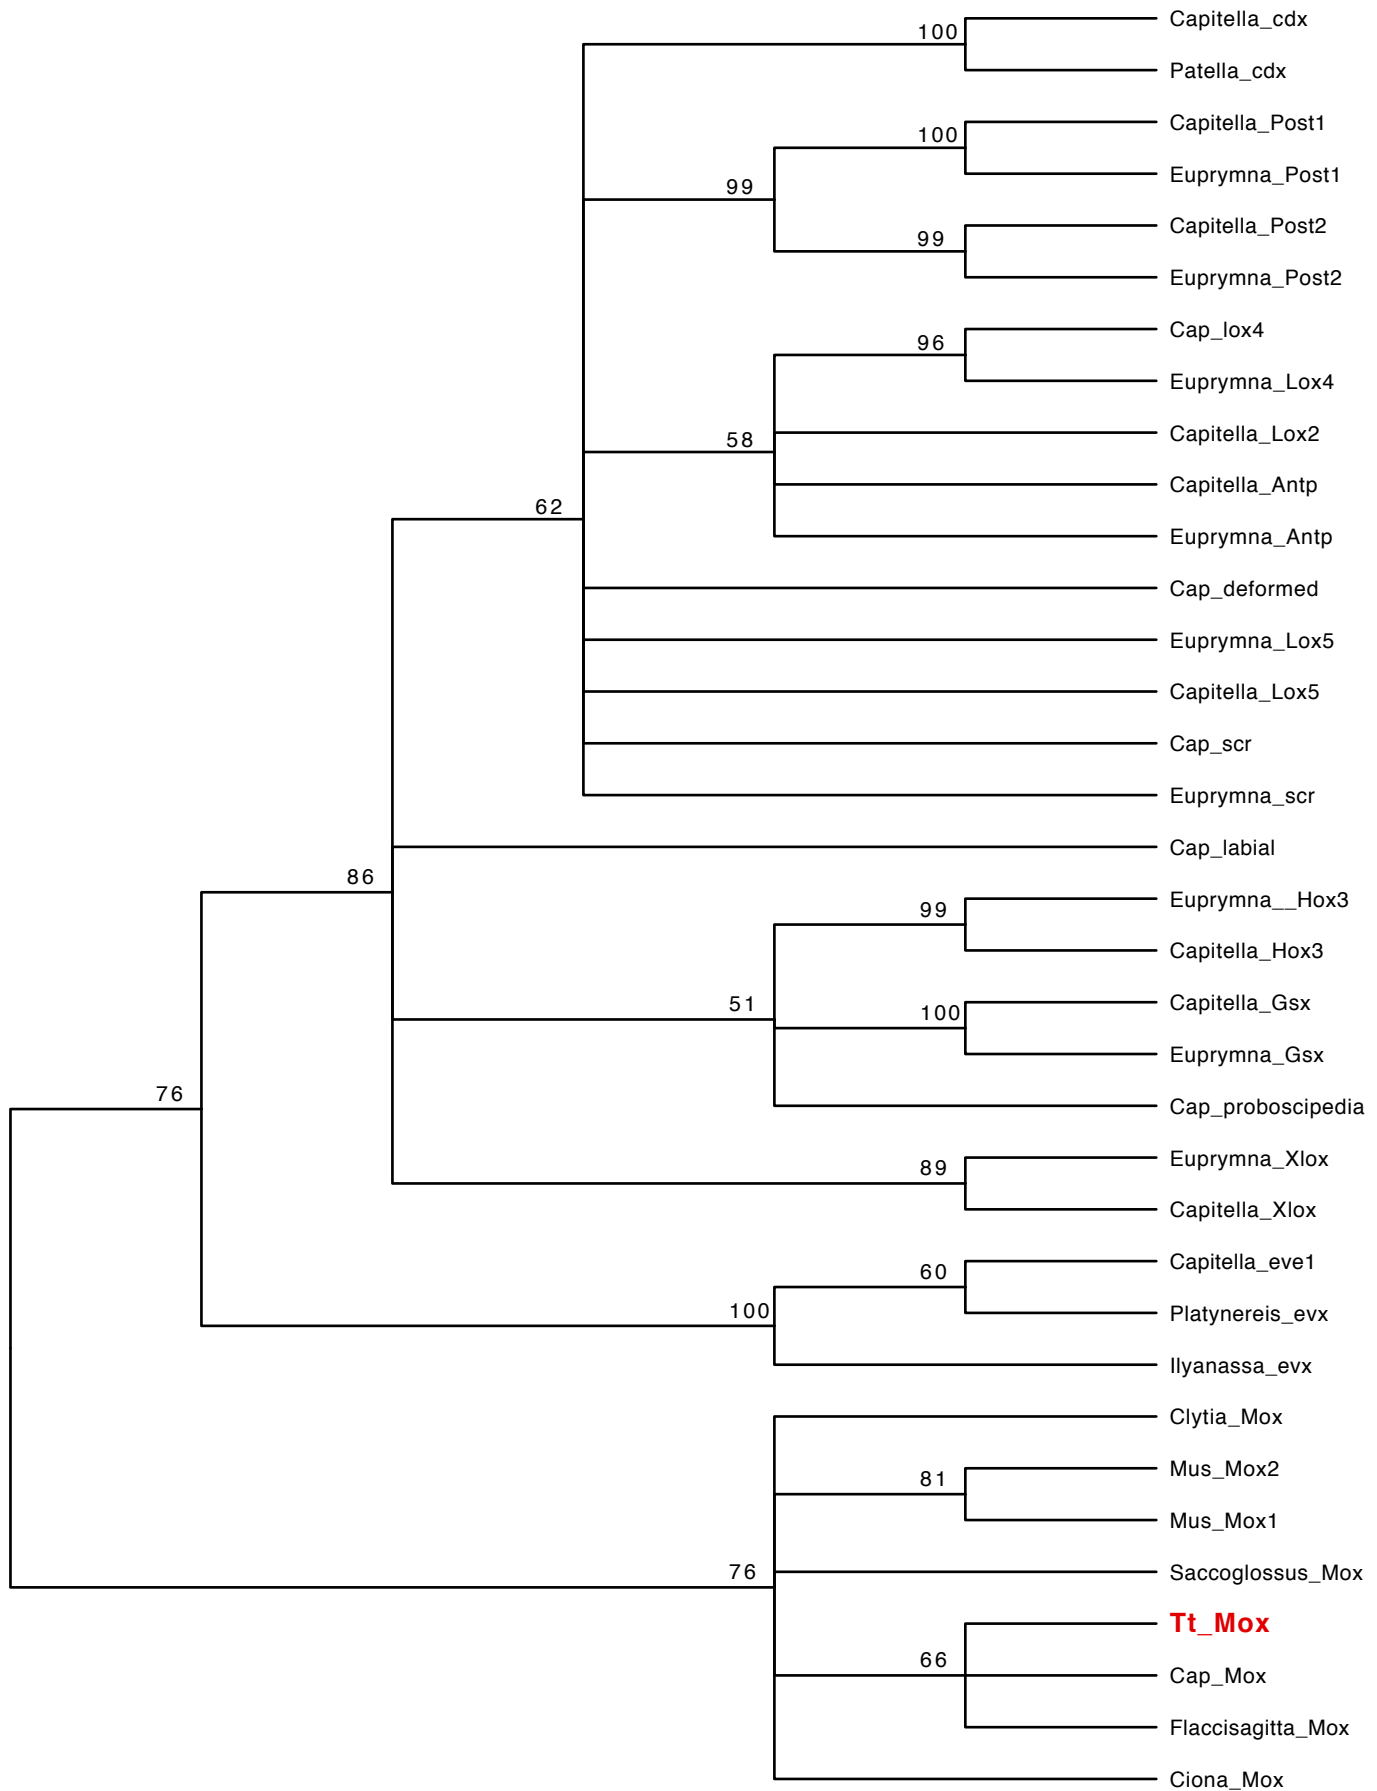

Supplement: 13227_2015_4_MOESM11_ESM.pdf [file 13227_2015_4_MOESM11_ESM.pdf]
