# Supplementary material for: Mesodermal gene expression during the embryonic and larval development of the articulate brachiopod Terebratalia transversa
Source: Springer Nature journal article supplement (doi:10.1186/s13227-015-0004-8), 2015-04-11
Supplement: MOESM6 [file 13227_2015_4_MOESM6_ESM.pdf]

| Gene                  | GenBank accession |
|-----------------------|-------------------|
| <i>Tt.dachshund</i>   | KP168451          |
| <i>Tt.eya</i>         | KP168452          |
| <i>Tt.FoxC</i>        | KP168453          |
| <i>Tt.FoxD</i>        | KP168454          |
| <i>Tt.FoxF</i>        | KP168455          |
| <i>Tt.GATA456</i>     | KP168456          |
| <i>Tt.Limpet</i>      | KP168457          |
| <i>Tt.MEF2</i>        | KP168458          |
| <i>Tt.mPrx</i>        | KP168459          |
| <i>Tt.Mox</i>         | KP168460          |
| <i>Tt.MyoD</i>        | KP168461          |
| <i>Tt.NK1</i>         | KP168462          |
| <i>Tt.noggin</i>      | KP168463          |
| <i>Tt.paraxis</i>     | KP168464          |
| <i>Tt.Pax1/9</i>      | KP168465          |
| <i>Tt.Six1/2</i>      | KP168466          |
| <i>Tt.tropomyosin</i> | DQ493898          |
| <i>Tt.twist</i>       | KP168467          |
