# Supplementary material for: Mesodermal gene expression during the embryonic and larval development of the articulate brachiopod Terebratalia transversa
Source: Springer Nature journal article supplement (doi:10.1186/s13227-015-0004-8), 2015-04-11

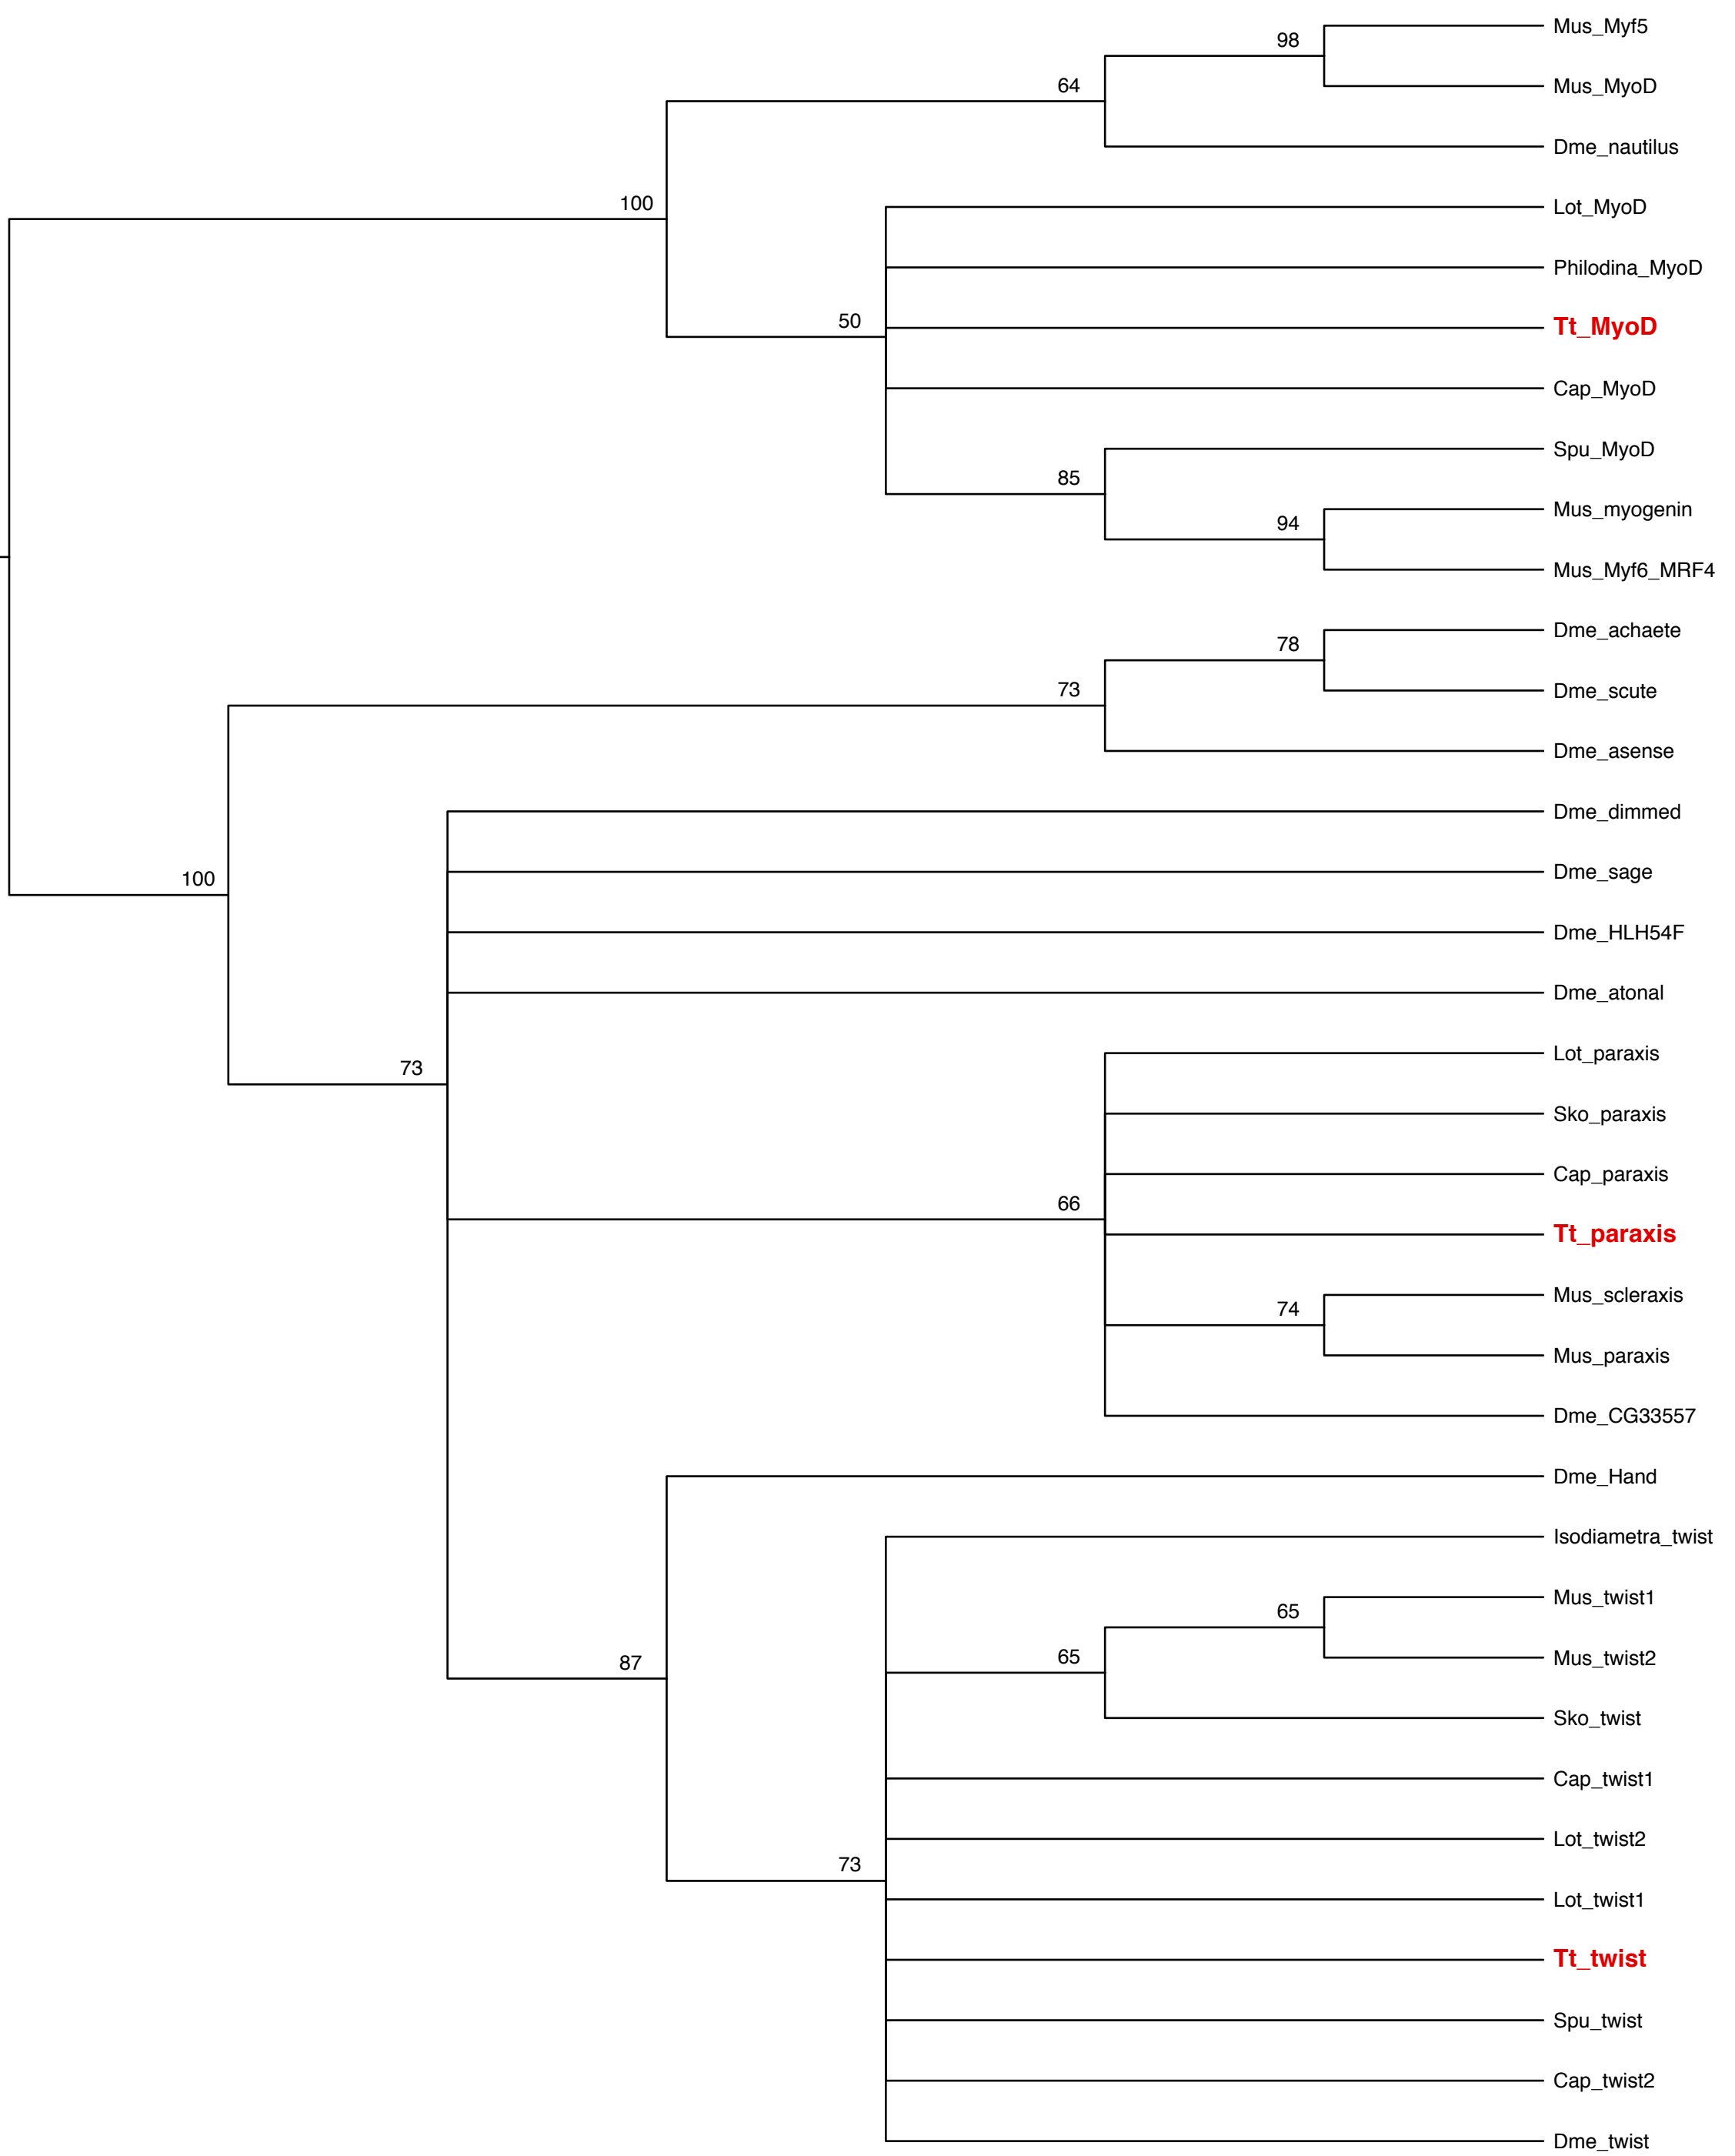

Supplement: MOESM7 [file 13227_2015_4_MOESM7_ESM.pdf]
